# Supplementary material for: Sleep need driven oscillation of glutamate synaptic phenotype
Source: eLife. 2025 Feb 14;13:RP98280. doi: 10.7554/eLife.98280 (PMC11828481; doi:10.7554/eLife.98280)
Supplement: Figure 3—source data 1. [file elife-98280-fig3-data1.xlsx]

## Sheet: Prob Cell type spec DEG  P(H|E)
# Genes (Median)
CELLTYPE	CS				SD						P(H|E)
	CS_A1	CS_A2	CS_A5	CS_A6	SD_A3	SD_A4	SD_A7	SD_A8	Avg all samples	DEGtype	DEGtype/GENEtype	DEGtype/DEGall
MICRO	1089	1064	531	743	919.5	1205	1169.5	1123	980.5	4	0.00407955	0.00508906
ASTRO	1500	1597	786.5	1024.5	1336	1586	1597	1591	1377.25	19	0.0137956	0.024173
OLIGO	1113	1190	632.5	824	989	1265	1303	1241	1069.69	6	0.00560911	0.00763359
OPC	1537	1630	794	1072	1408	1557	1691	1699.5	1423.56	6	0.00421478	0.00763359
EX_L2-3_IT	2956	3191	1831	2332	2936	3016	3186.5	3262	2838.81	170	0.0598842	0.216285
EX_L4-5_IT	2701	2839	1620.5	2088	2767	2781	3005	2931	2591.56	119	0.0459182	0.151399
EX_L5_IT	2810	3191.5	1976.5	2488	3105.5	3104	3367	3260	2912.81	153	0.0525266	0.194656
EX_L6_IT	2813	3041	1806	2217	2726	2879	3061	3090	2704.12	75	0.0277354	0.0954198
EX_L6b	2224	3020.5	1743	2288	2850.5	2671	3102.5	3059.5	2619.88	22	0.00839735	0.0279898
EX_L5_ET	2680	3425	2403.5	2819	3345	3220	3637	3435	3120.56	8	0.00256364	0.0101781
EX_L5-6_NP	2316	2395.5	1367	1807	2250.5	2276.5	2516.5	2463	2174	5	0.00229991	0.00636132
EX_L6_CT	2792.5	2834	1629	2071.5	2580	2715.5	2949	2926	2562.19	67	0.0261495	0.0852417
IN_Lamp5	2556	3065	2068	2239	2917	2650	2990.5	2433	2614.81	0	0	0
IN_Pvalb	2146	2809	1557	2055	2519	2666	2878	2866	2437	44	0.018055	0.0559796
IN_Sncg	2014	2294	1270.5	1617.5	2081	2186	2407.5	2370	2030.06	25	0.0123149	0.0318066
IN_Sst	2335	2682	1529.5	1903.5	2387	2430	2718	2699	2335.5	56	0.0239777	0.0712468
IN_Vip	2437.5	2360.5	1520	1781	1929	2253	2467	2401.5	2143.69	7	0.0032654	0.00890585
								sum=	37936	786	DEGall	1
Endothelial	1126	1249.5	660	978	1205.5	1535	1334	1202	1161.25	1	0.000861141
Pericytes	1060	1062	505.5	761	949	1280.5	1240.5	1165	1002.94	3	0.00299121
PVM	1112	1073.5	576	769	988	1268	1108	1120.5	1001.88	0	0		cl
VLMC	1401	1525	763	1025	1441.5	1591	1575	1589	1363.81	13	0.0095321

## Sheet: DEG type & subtype distribution
type	DEG fraction			subtype	DEG fraction
Glia	0.0445293			MICRO	0.00508906
ExIT	0.685751			ASTRO	0.024173
ExnonIT	0.101781			OLIGO	0.00763359
IN	0.167939			OPC	0.00763359
				EX_L2-3_IT	0.216285
				EX_L4-5_IT	0.151399
				EX_L5_IT	0.194656
				EX_L6_IT	0.0954198
				EX_L6b	0.0279898
				EX_L5_ET	0.0101781
				EX_L5-6_NP	0.00636132
				EX_L6_CT	0.0852417
				IN_Lamp5	0
				IN_Pvalb	0.0559796
				IN_Sncg	0.0318066
				IN_Sst	0.0712468
				IN_Vip	0.00890585
				IN	0.167939
				ExnonIT	0.101781
				ExIT	0.685751
				Glia	0.0445293
				total	1
